# Supplementary material for: Hexafluorophosphate ionic liquid-modified silica sorbent for selective separation and preconcentration of Pb2+, Cd2+, and Cr3+ in water samples
Source: Royal Society of Chemistry journal article supplement (doi:10.1039/d3su00247k), 2023-11-10
Supplement: d3su00247k1.pdf [file d3su00247k1.pdf]

## Hexafluorophosphate Ionic liquids-modified Silica Sorbent For Selective Separation and Preconcentration of Pb<sup>2+</sup>, Cd<sup>2+</sup>, and Cr<sup>3+</sup> in Water Samples

Linh Dieu Nguyen,<sup>a,b</sup> The Thai Nguyen,<sup>a,b</sup> Nhi Hoang Nguyen,<sup>a,b</sup> Chi Thien Gia Hua,<sup>a,b</sup>  
Tan Hoang Le Doan,<sup>b,c</sup> Linh Thuy Ho Nguyen,<sup>b,c</sup> Phuong Hoang Tran<sup>a,b\*</sup>

<sup>a</sup> Department of Organic Chemistry, Faculty of Chemistry, University of Science, Ho Chi Minh City, Vietnam.

<sup>b</sup> Vietnam National University, Ho Chi Minh City, Vietnam.

<sup>c</sup> Center for Innovative Materials and Architectures (INOMAR), Ho Chi Minh City

\* Corresponding authors: [thphuong@hcmus.edu.vn](mailto:thphuong@hcmus.edu.vn) (Phuong Hoang Tran)

List of Figure:

|                                                                                      |    |
|--------------------------------------------------------------------------------------|----|
| <b>Figure S1:</b> <sup>1</sup> H-NMR of DL1 .....                                    | 1  |
| <b>Figure S2:</b> <sup>13</sup> C-NMR of DL1 .....                                   | 2  |
| <b>Figure S3:</b> <sup>1</sup> H-NMR of DL2 .....                                    | 3  |
| <b>Figure S4:</b> <sup>13</sup> C-NMR of DL2 .....                                   | 4  |
| <b>Figure S5:</b> <sup>1</sup> H-NMR of DL3 .....                                    | 5  |
| <b>Figure S6:</b> <sup>13</sup> C-NMR of DL3 .....                                   | 6  |
| <b>Figure S7:</b> <sup>1</sup> H-NMR of DL4 .....                                    | 7  |
| <b>Figure S8:</b> <sup>13</sup> C-NMR of DL4 .....                                   | 8  |
| <b>Figure S9:</b> <sup>1</sup> H-NMR of DL5 .....                                    | 9  |
| <b>Figure S10:</b> <sup>13</sup> C-NMR of DL5 .....                                  | 10 |
| <b>Figure S11:</b> FT-IR spectra DL2-SiO <sub>2</sub> , SiO <sub>2</sub> , DL2 ..... | 11 |
| <b>Figure S12:</b> FT-IR spectra DL3-SiO <sub>2</sub> , SiO <sub>2</sub> , DL3 ..... | 12 |
| <b>Figure S13:</b> FT-IR spectra DL4-SiO <sub>2</sub> , SiO <sub>2</sub> , DL4 ..... | 13 |
| <b>Figure S14:</b> FT-IR spectra DL5-SiO <sub>2</sub> , SiO <sub>2</sub> , DL5 ..... | 14 |
| <b>Figure S15:</b> BET of DL1-SiO <sub>2</sub> .....                                 | 15 |

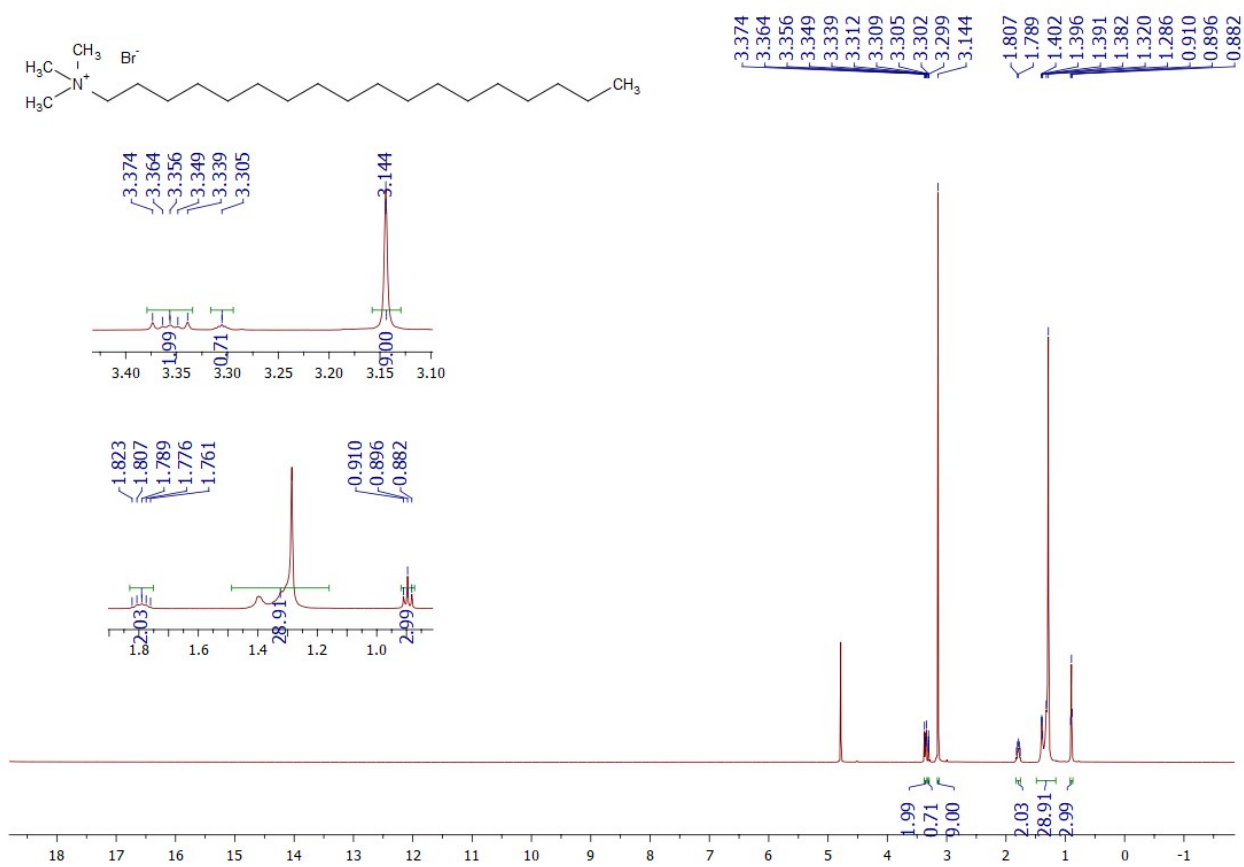

**Figure S1:**  $^1\text{H-NMR}$  of DL1

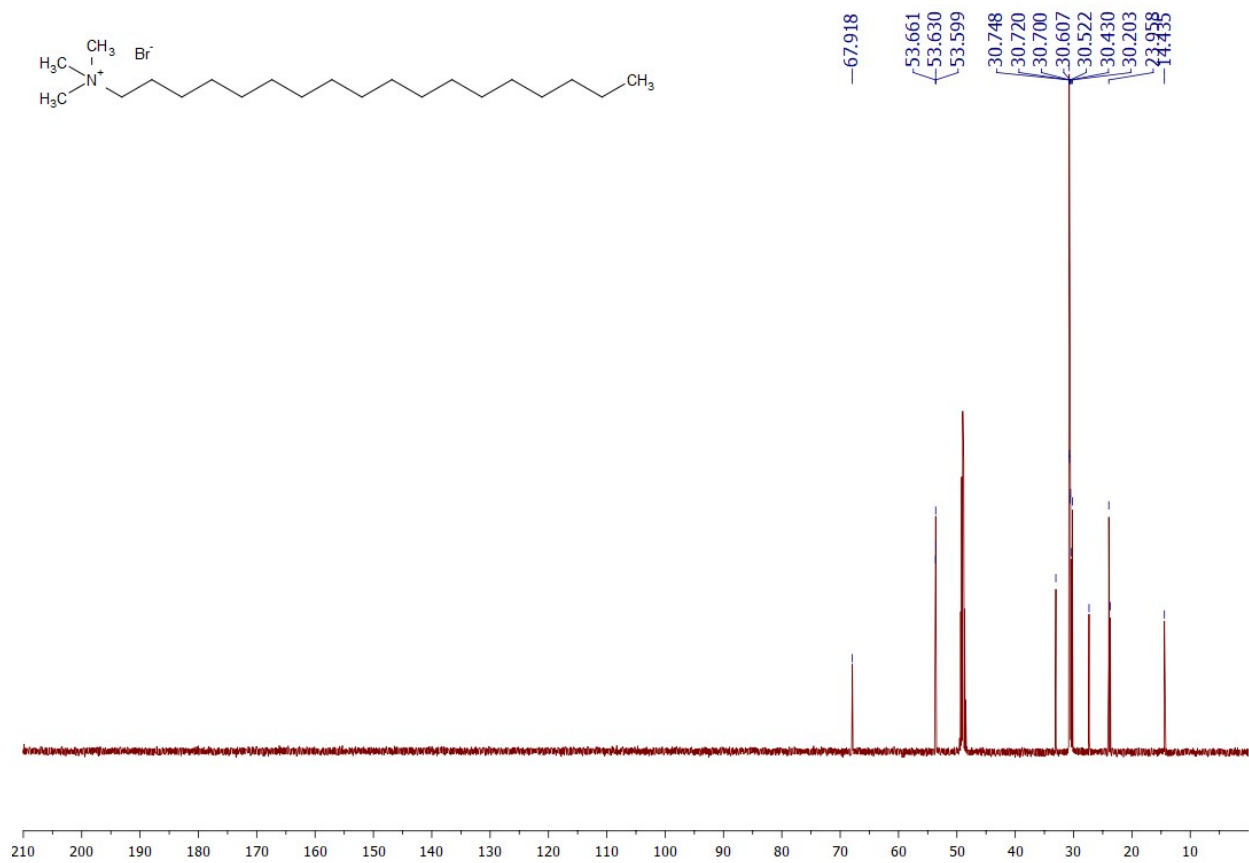

**Figure S2:** <sup>13</sup>C-NMR of DL1

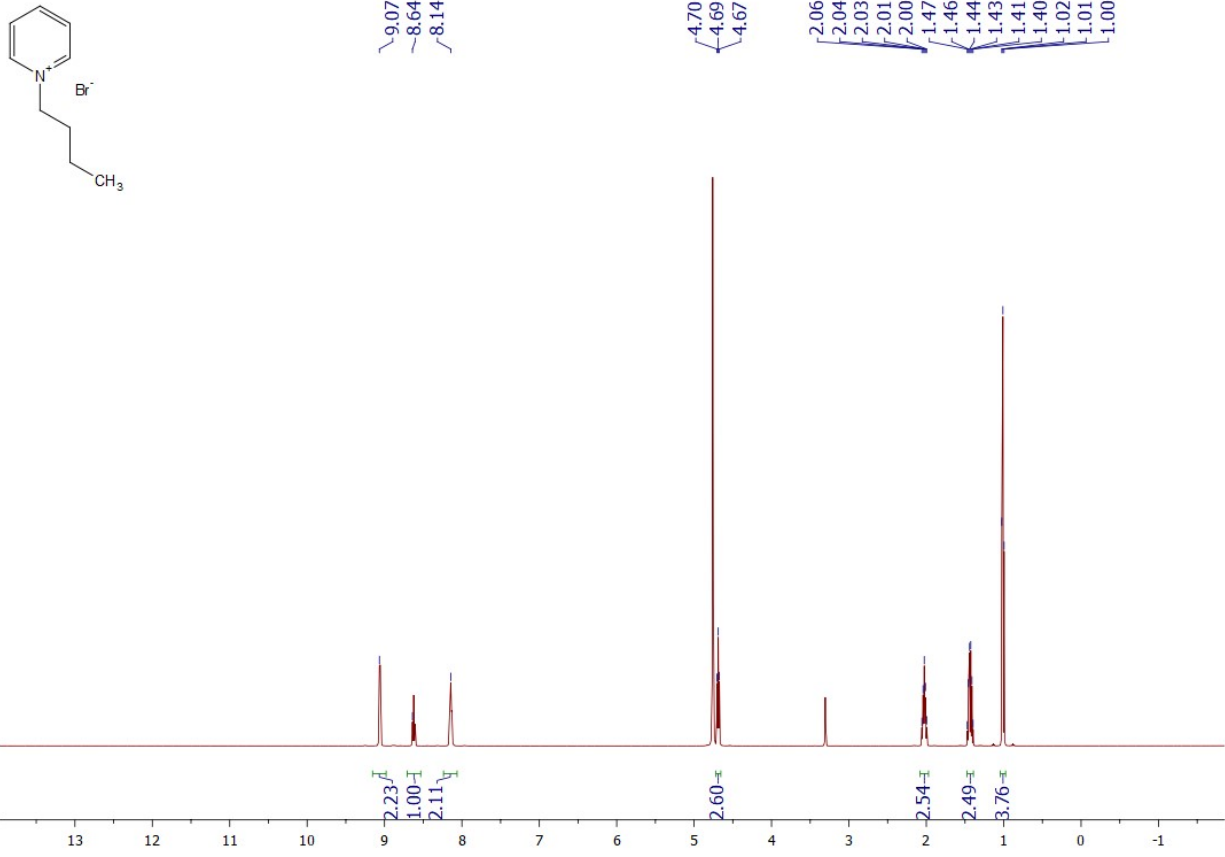

Figure S3: <sup>1</sup>H-NMR of DL2

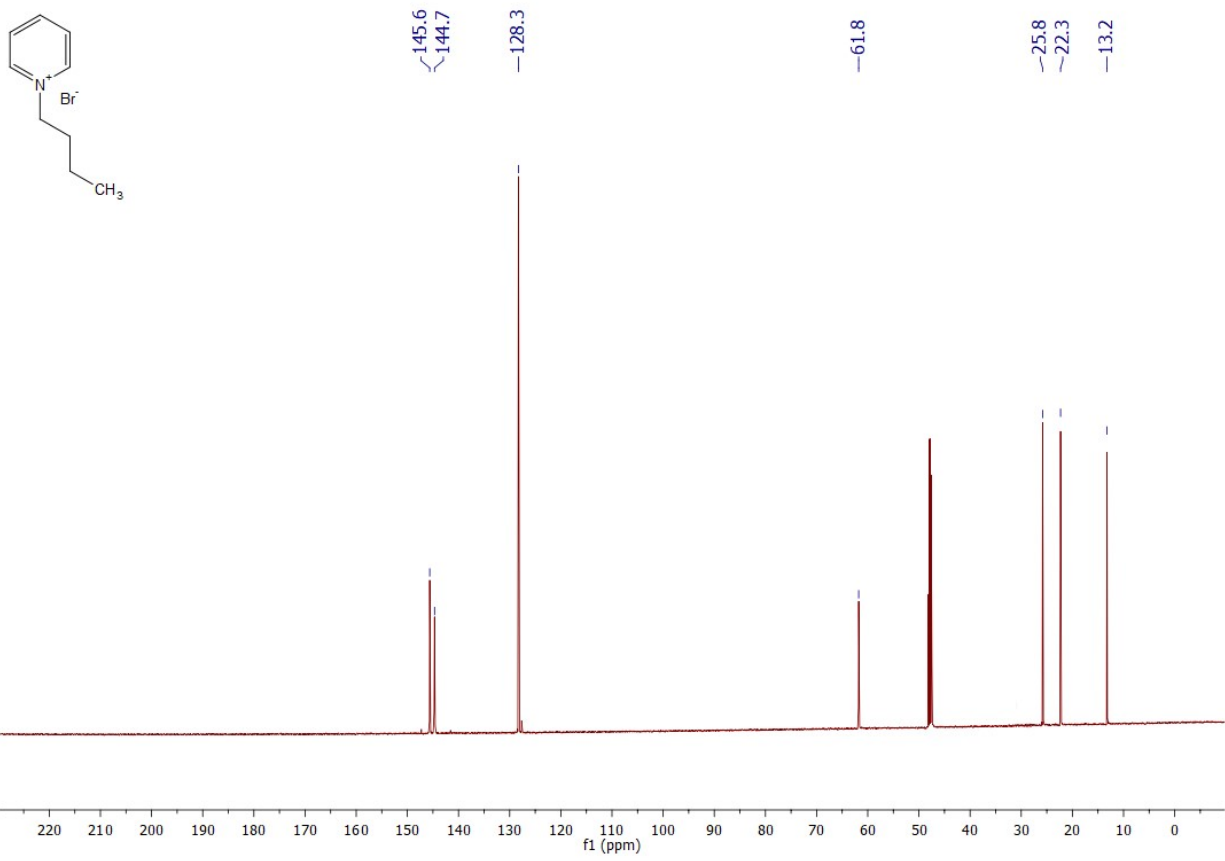

**Figure S4:** <sup>13</sup>C-NMR of DL2

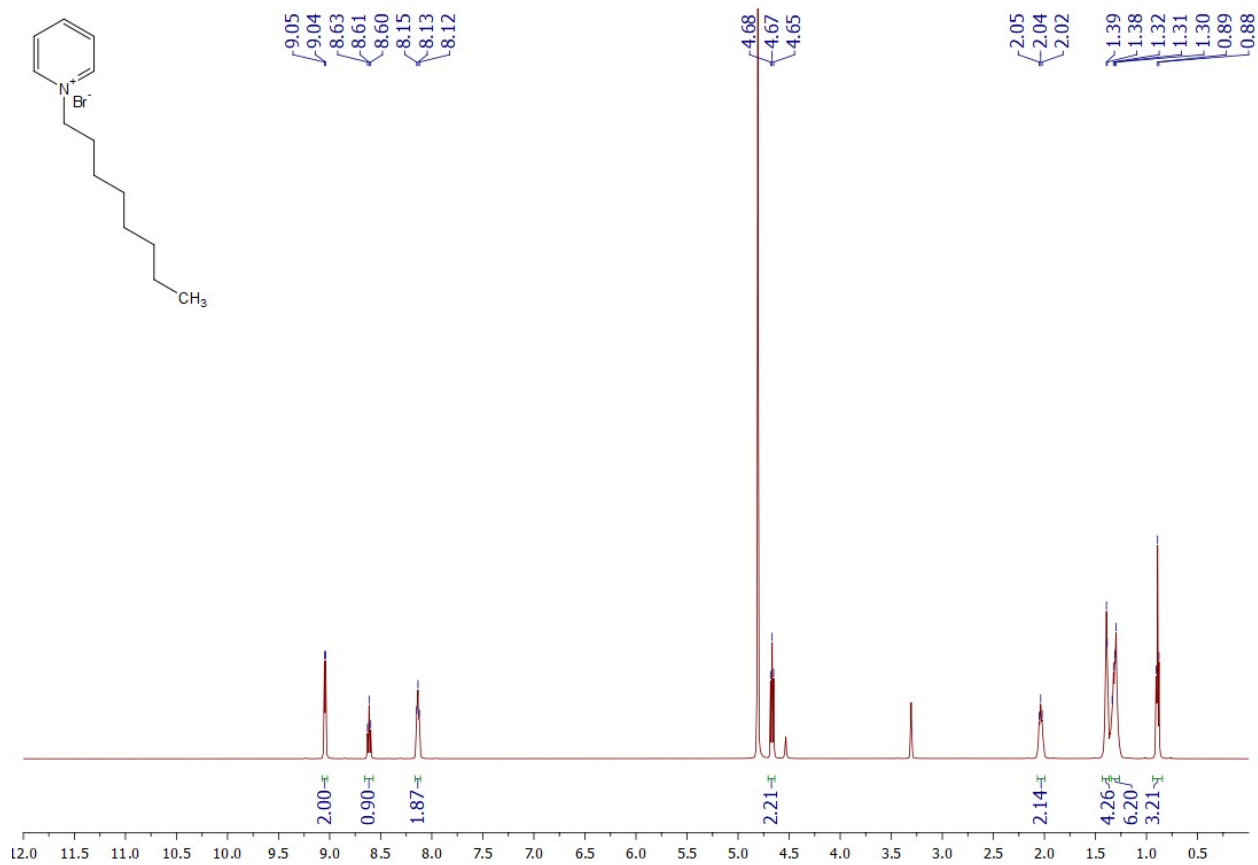

**Figure S5:** <sup>1</sup>H-NMR of DL3

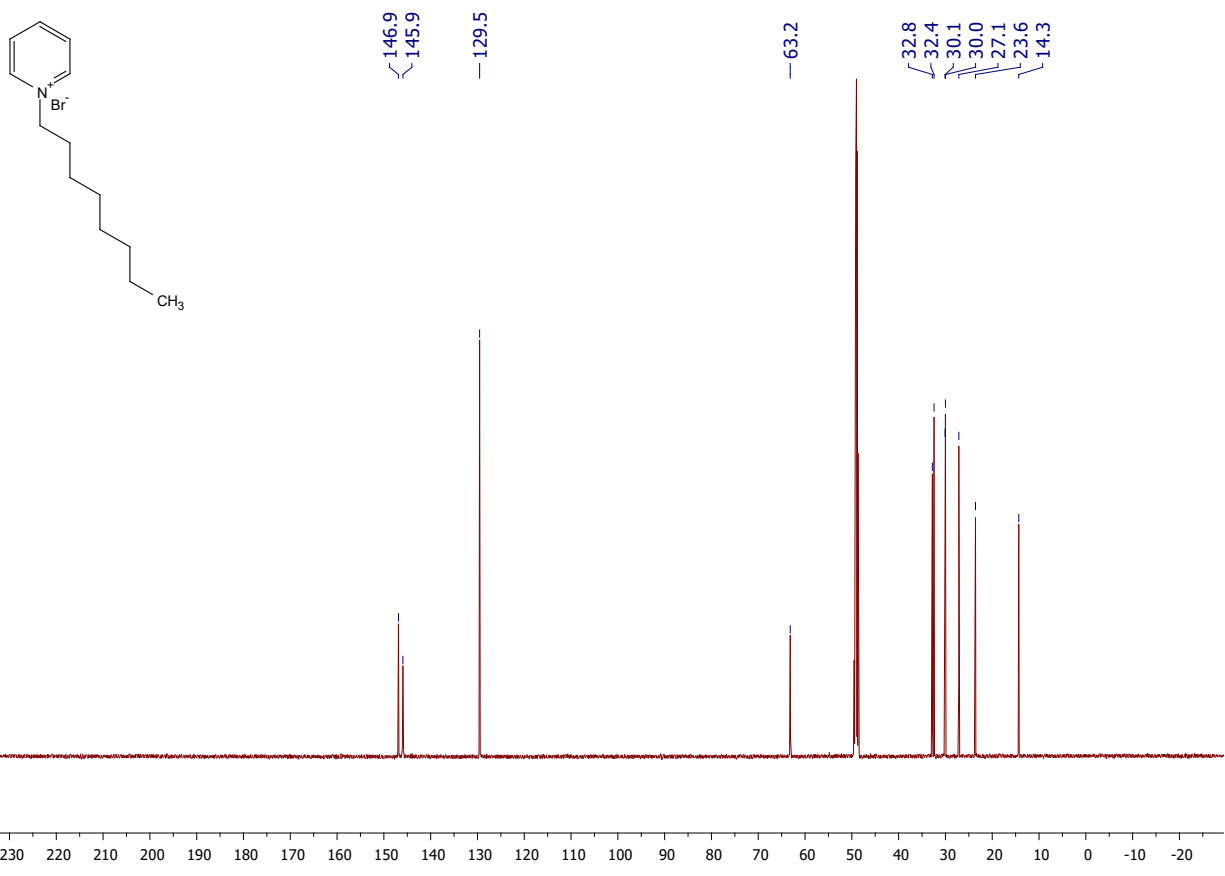

Figure S6: <sup>13</sup>C-NMR of DL3

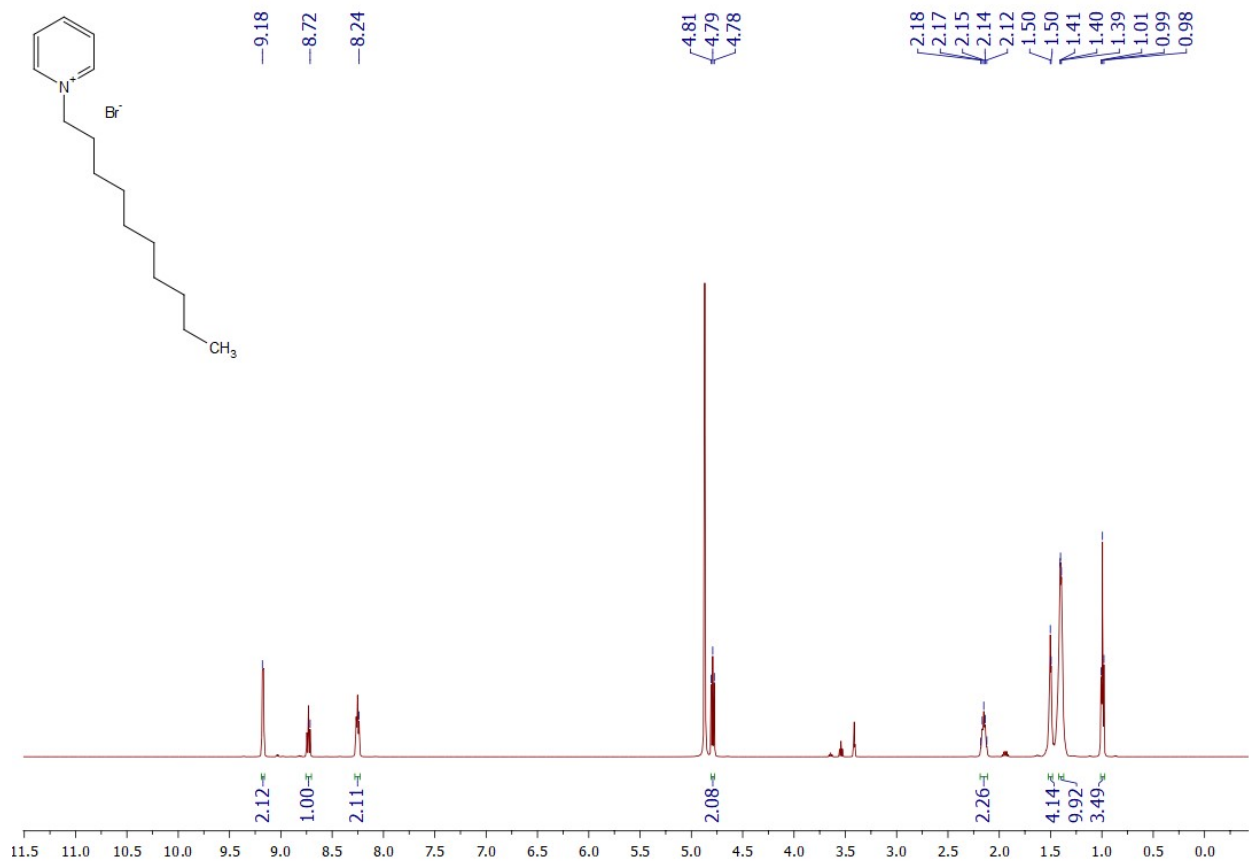

**Figure S7:** <sup>1</sup>H-NMR of DL4



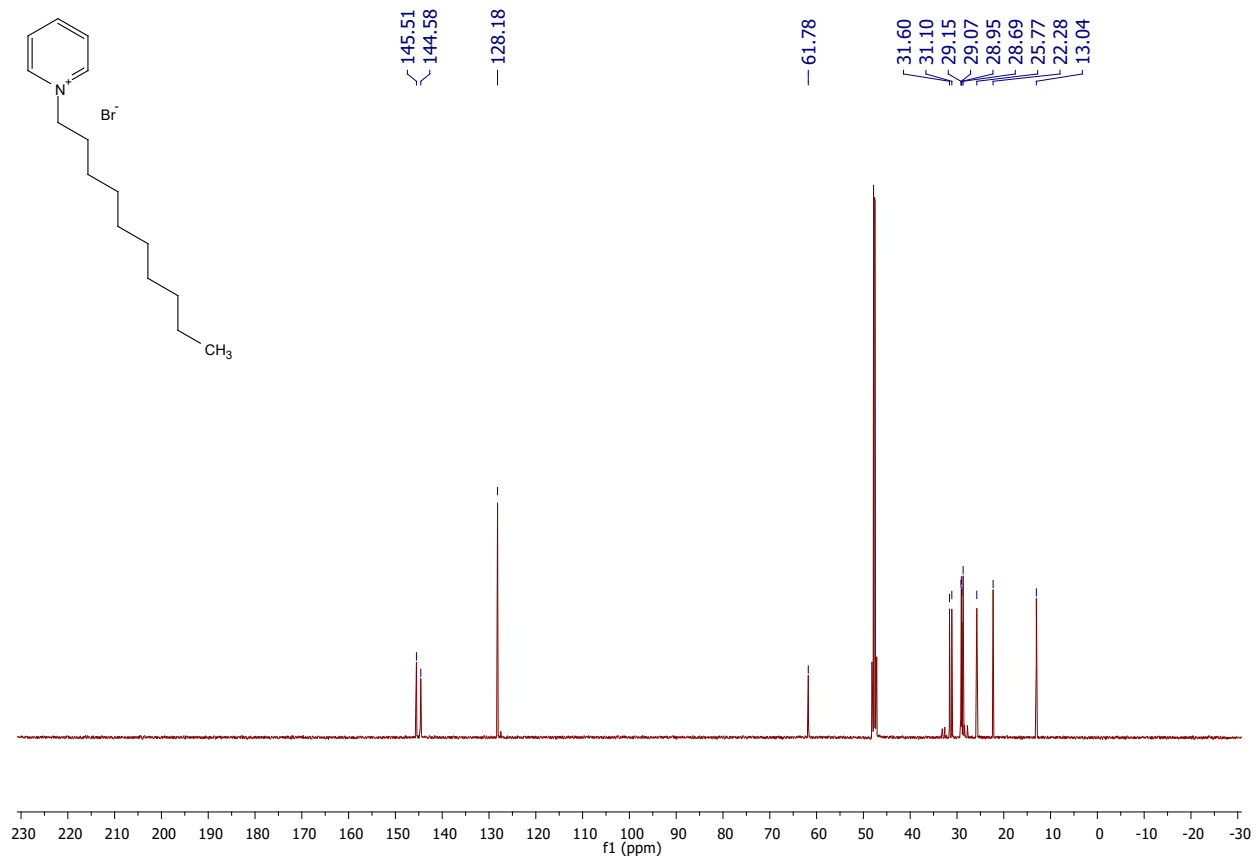

**Figure S8:** <sup>13</sup>C-NMR of DL4

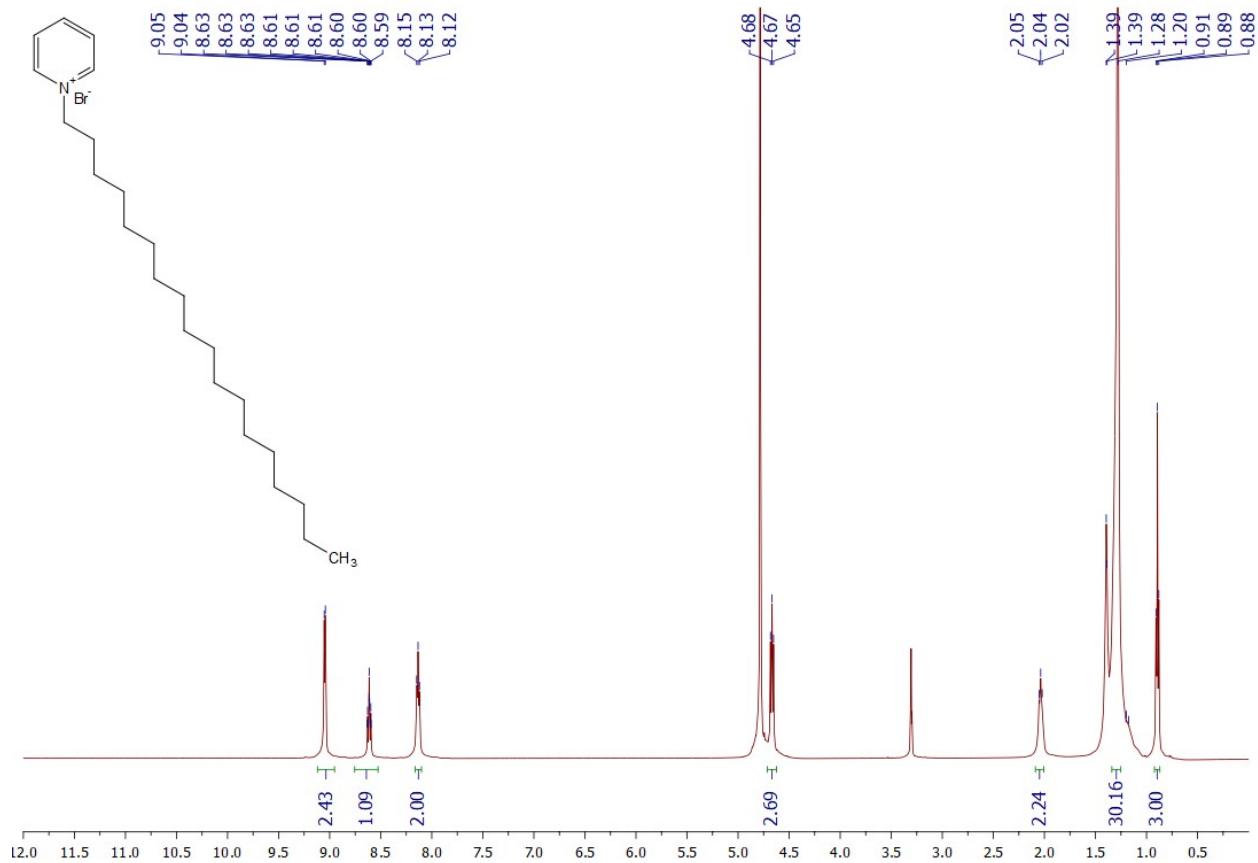

**Figure S9:**  $^1\text{H-NMR}$  of DL5

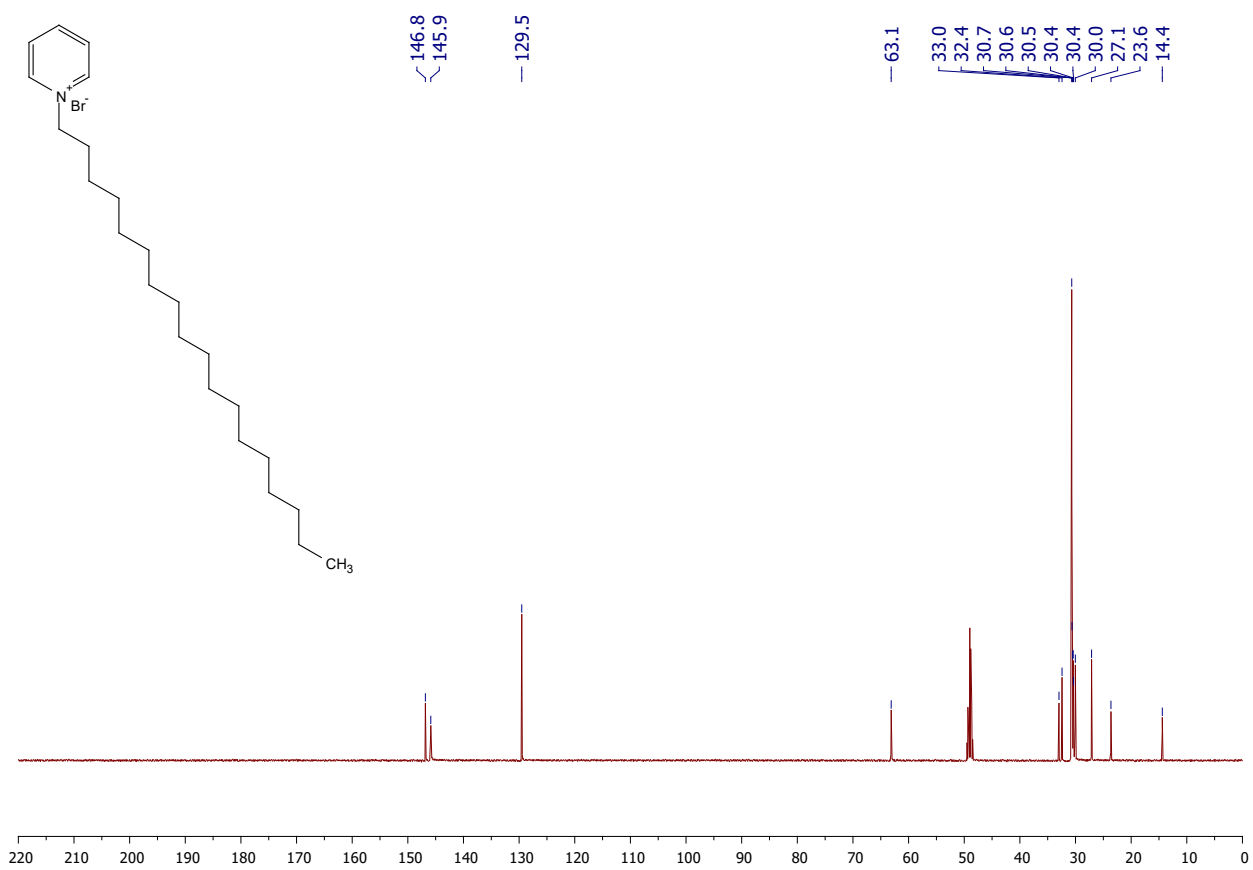

**Figure S10.** <sup>13</sup>C-NMR of DL5

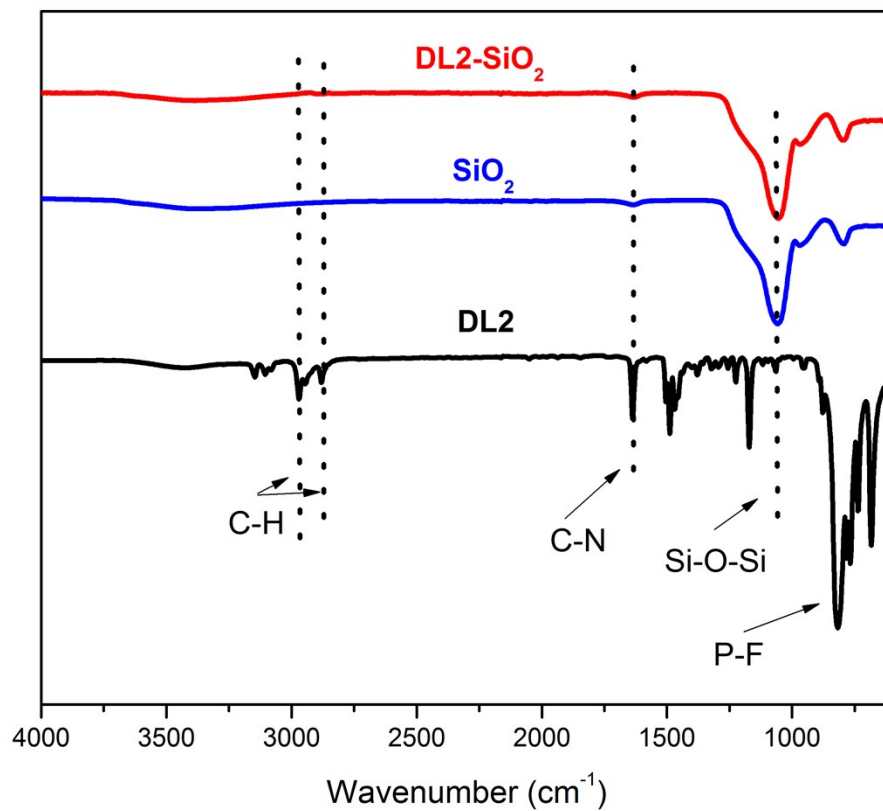

**Figure S11:** FT-IR spectra DL2-SiO<sub>2</sub>, SiO<sub>2</sub>, DL2

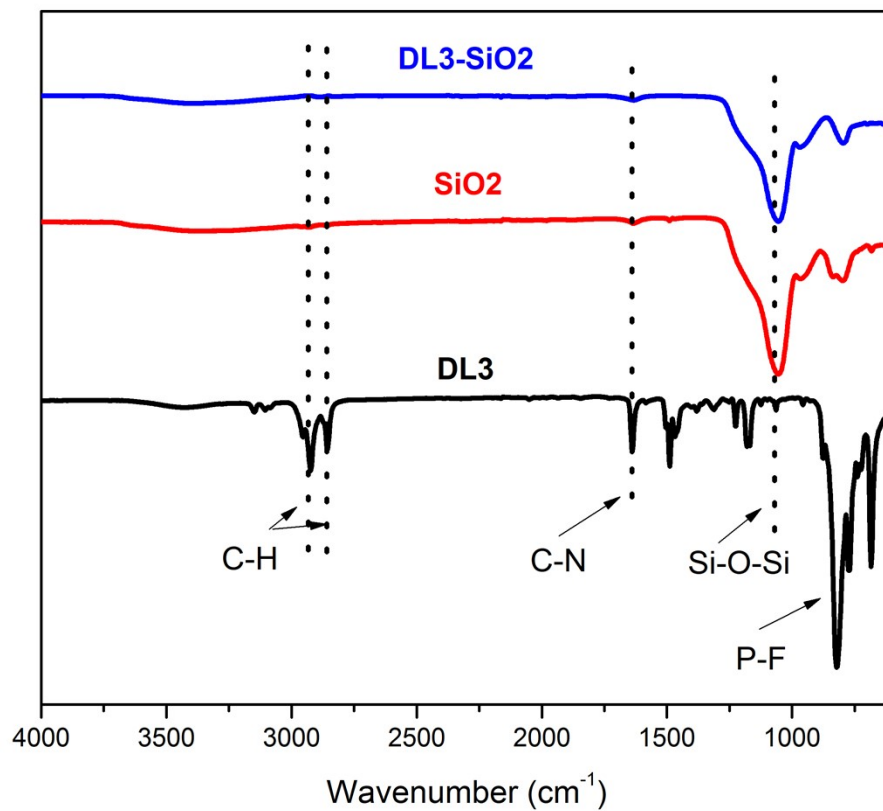

**Figure S12:** FT-IR spectra DL3-SiO<sub>2</sub>, SiO<sub>2</sub>, DL3

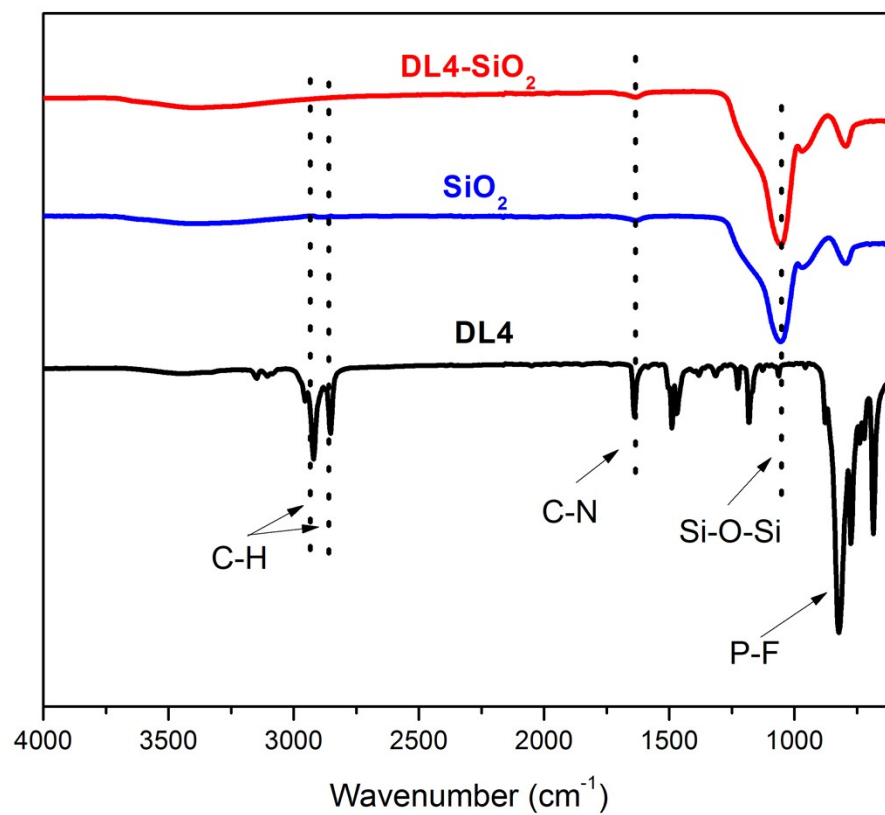

**Figure S13:** FT-IR spectra DL4-SiO<sub>2</sub>, SiO<sub>2</sub>, DL4

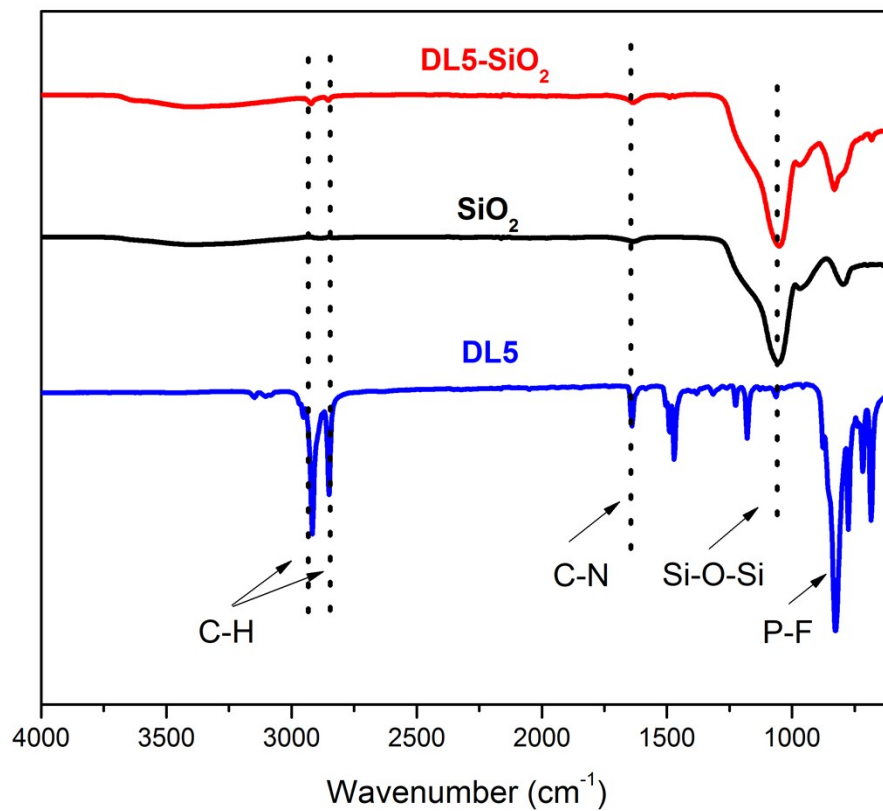

**Figure S14:** FT-IR spectra DL5-SiO<sub>2</sub>, SiO<sub>2</sub>, DL5

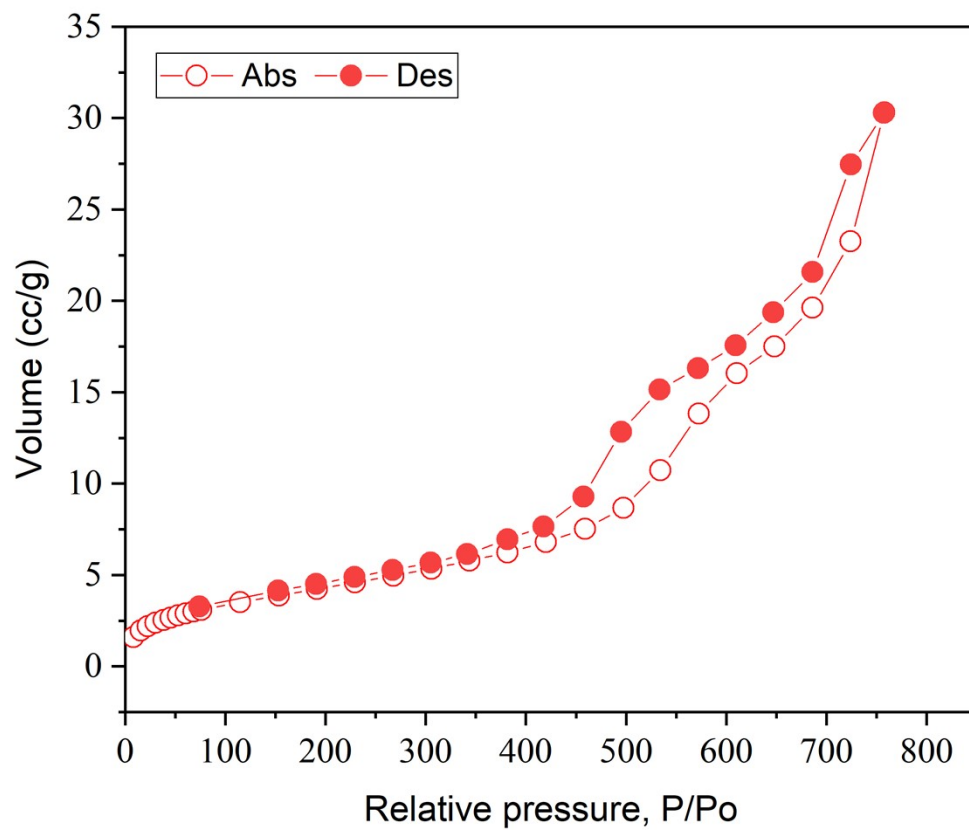

**Figure S15:** BET of DL1-SiO<sub>2</sub>
